# Supplementary material for: The structures and stability of BnNn clusters with octagon(s)
Source: Royal Society of Chemistry journal article supplement (doi:10.1039/c2ra21720a), 2012-01-01

**S1.** The number of isomers all considered  $(\text{BN})_n\text{-F}_4\text{F}_6\text{F}_8$  clusters by running the revised version of CaGe software.

| Mol.                         | 0F8 | 1F8 | 2F8  | 3F8   | 4F8    | 5F8    | 6F8    | 7F8    | 8F8   | 9F8  | 10F8 |
|------------------------------|-----|-----|------|-------|--------|--------|--------|--------|-------|------|------|
| $\text{B}_{15}\text{N}_{15}$ | 2   | 18  | 62   | 77    | 41     | -      | -      | -      | -     | -    | -    |
| $\text{B}_{16}\text{N}_{16}$ | 8   | 24  | 129  | 215   | 153    | 26     | 13     | -      | -     | -    | -    |
| $\text{B}_{17}\text{N}_{17}$ | 3   | 31  | 205  | 459   | 446    | 143    | -      | -      | -     | -    | -    |
| $\text{B}_{18}\text{N}_{18}$ | 7   | 47  | 356  | 1007  | 1390   | 598    | 136    | -      | -     | -    | -    |
| $\text{B}_{19}\text{N}_{19}$ | 7   | 64  | 549  | 2050  | 3383   | 2355   | 603    | -      | -     | -    | -    |
| $\text{B}_{20}\text{N}_{20}$ | 7   | 76  | 917  | 3864  | 8438   | 7790   | 2961   | 361    | 48    | -    | -    |
| $\text{B}_{21}\text{N}_{21}$ | 5   | 107 | 1322 | 7084  | 18865  | 22774  | 12332  | 2387   | -     | -    | -    |
| $\text{B}_{22}\text{N}_{22}$ | 14  | 154 | 2033 | 12629 | 40326  | 61979  | 45873  | 12575  | 1720  | -    | -    |
| $\text{B}_{23}\text{N}_{23}$ | 6   | 176 | 2889 | 21413 | 81157  | 15612  | 14614  | 62399  | 9213  | -    | -    |
| $\text{B}_{24}\text{N}_{24}$ | 12  | 227 | 4199 | 35362 | 158512 | 366080 | 439082 | 250056 | 60145 | 4947 | 423  |

**S2** The relative energies (in kcal/mol) of the three most stable isomers of  $(\text{BN})_{15}\text{-F}_4\text{F}_6\text{F}_8$  clusters with different methods.

| Molecule                                 | BHandHLYP | B3LYP   |           | MP2     |
|------------------------------------------|-----------|---------|-----------|---------|
|                                          | /6-31G*   | /6-31G* | /6-311+G* | /6-31G* |
| $(\text{BN})_{15}\text{-0F}_8\text{-01}$ | 0.00      | 0.00    | 0.00      | 0.00    |
| $(\text{BN})_{15}\text{-1F}_8\text{-13}$ | 59.08     | 55.46   | 55.41     | 61.58   |
| $(\text{BN})_{15}\text{-1F}_8\text{-15}$ | 58.78     | 55.73   | 55.65     | 61.31   |

**Supplementary Information 3 (S3)** The B3LYP/6-31G\* relative energy (RE, in kcal/mol), symmetry, the binding energy (BE, in kcal/mol), the number of B<sub>44</sub> bonds (E<sub>44</sub>), HOMO-LUMO gap (in eV), sphericity (SP), asphericity (AS), the nucleus-independent chemical shift (NICS) and the average PA (°) of B (PA<sub>B</sub>) and N (PA<sub>N</sub>) atoms of (BN)<sub>n</sub>-F<sub>4</sub>F<sub>6</sub>F<sub>8</sub> (n = 15- 24) clusters.

| Molecule                                   | sym.                  | RE          | BE             | E <sub>44</sub> | Gap         | HOMO         | LUMO         | SP          | AS          | NICS         | PA <sub>B</sub> | PA <sub>N</sub> |
|--------------------------------------------|-----------------------|-------------|----------------|-----------------|-------------|--------------|--------------|-------------|-------------|--------------|-----------------|-----------------|
| <b>(BN)<sub>15</sub>-0F<sub>8</sub>-01</b> | <b>C<sub>3h</sub></b> | <b>0.00</b> | <b>-346.51</b> | <b>0</b>        | <b>6.58</b> | <b>-7.56</b> | <b>-0.97</b> | <b>0.11</b> | <b>0.30</b> | <b>-3.36</b> | <b>10.28</b>    | <b>24.76</b>    |
| (BN) <sub>15</sub> -1F <sub>8</sub> -13    | C <sub>1</sub>        | 55.46       | -342.81        | 1               | 6.02        | -7.42        | -1.40        | 0.16        | 0.50        | -3.73        | 9.87            | 24.07           |
| (BN) <sub>15</sub> -1F <sub>8</sub> -15    | C <sub>S</sub>        | 55.73       | -342.79        | 2               | 6.14        | -7.38        | -1.24        | 0.12        | 0.35        | -4.53        | 9.98            | 24.63           |
| (BN) <sub>15</sub> -1F <sub>8</sub> -14    | C <sub>1</sub>        | 72.62       | -341.67        | 2               | 6.08        | -7.37        | -1.29        | 0.14        | 0.54        | -4.37        | 10.43           | 24.13           |
| (BN) <sub>15</sub> -1F <sub>8</sub> -06    | C <sub>1</sub>        | 83.18       | -340.96        | 3               | 5.90        | -7.48        | -1.58        | 0.13        | 0.66        | -4.67        | 10.45           | 24.36           |
| (BN) <sub>15</sub> -2F <sub>8</sub> -45    | C <sub>1</sub>        | 86.81       | -340.72        | 2               | 5.95        | -7.43        | -1.48        | 0.14        | 0.45        | -3.64        | 9.82            | 24.11           |
| (BN) <sub>15</sub> -0F <sub>8</sub> -02    | C <sub>1</sub>        | 87.02       | -340.71        | 2               | 5.65        | -7.43        | -1.78        | 0.28        | 1.24        | -4.82        | 10.80           | 24.88           |
| (BN) <sub>15</sub> -1F <sub>8</sub> -03    | C <sub>1</sub>        | 94.53       | -340.21        | 2               | 5.67        | -7.45        | -1.78        | 0.25        | 0.99        | -4.39        | 10.48           | 24.26           |
| (BN) <sub>15</sub> -2F <sub>8</sub> -38    | C <sub>1</sub>        | 94.87       | -340.18        | 3               | 5.92        | -7.54        | -1.62        | 0.12        | 0.41        | -4.42        | 10.25           | 24.14           |
| (BN) <sub>15</sub> -1F <sub>8</sub> -11    | C <sub>1</sub>        | 108.22      | -339.29        | 3               | 5.78        | -7.40        | -1.62        | 0.32        | 1.44        | -4.18        | 10.76           | 24.94           |
| (BN) <sub>15</sub> -2F <sub>8</sub> -41    | C <sub>1</sub>        | 111.06      | -339.10        | 3               | 5.73        | -7.38        | -1.65        | 0.23        | 0.99        | -3.92        | 10.32           | 24.68           |
| (BN) <sub>15</sub> -2F <sub>8</sub> -58    | C <sub>1</sub>        | 114.05      | -338.90        | 3               | 5.98        | -7.54        | -1.56        | 0.13        | 0.62        | -4.91        | 10.28           | 24.76           |
| (BN) <sub>15</sub> -1F <sub>8</sub> -04    | C <sub>1</sub>        | 114.15      | -338.90        | 3               | 5.70        | -7.59        | -1.89        | 0.20        | 0.97        | -4.88        | 10.88           | 24.66           |
| (BN) <sub>15</sub> -2F <sub>8</sub> -37    | C <sub>1</sub>        | 114.44      | -338.88        | 3               | 5.69        | -7.29        | -1.60        | 0.23        | 0.80        | -3.43        | 10.14           | 24.05           |
| (BN) <sub>15</sub> -1F <sub>8</sub> -12    | C <sub>1</sub>        | 116.34      | -338.75        | 2               | 5.68        | -7.33        | -1.65        | 0.32        | 1.47        | -4.05        | 10.62           | 25.06           |
| (BN) <sub>15</sub> -2F <sub>8</sub> -18    | C <sub>1</sub>        | 122.41      | -338.35        | 3               | 5.92        | -7.53        | -1.61        | 0.31        | 1.30        | -3.91        | 10.75           | 25.14           |
| (BN) <sub>15</sub> -1F <sub>8</sub> -16    | C <sub>1</sub>        | 130.53      | -337.81        | 2               | 5.39        | -7.32        | -1.92        | 0.22        | 0.87        | -3.48        | 10.65           | 24.84           |
| (BN) <sub>15</sub> -2F <sub>8</sub> -17    | C <sub>1</sub>        | 131.82      | -337.72        | 3               | 5.65        | -7.42        | -1.77        | 0.36        | 1.57        | -4.52        | 10.45           | 25.37           |
| (BN) <sub>15</sub> -2F <sub>8</sub> -42    | C <sub>1</sub>        | 135.84      | -337.45        | 3               | 5.64        | -7.42        | -1.78        | 0.19        | 0.88        | -4.02        | 10.34           | 24.91           |
| (BN) <sub>15</sub> -1F <sub>8</sub> -05    | C <sub>1</sub>        | 136.60      | -337.40        | 3               | 5.61        | -7.38        | -1.77        | 0.47        | 2.25        | -4.05        | 11.06           | 25.71           |
| (BN) <sub>15</sub> -2F <sub>8</sub> -40    | C <sub>1</sub>        | 152.79      | -336.32        | 4               | 5.87        | -7.46        | -1.59        | 0.34        | 1.74        | -4.91        | 10.74           | 24.93           |
| (BN) <sub>15</sub> -2F <sub>8</sub> -39    | C <sub>S</sub>        | 159.71      | -335.86        | 4               | 5.75        | -7.37        | -1.62        | 0.46        | 2.28        | -4.18        | 10.55           | 24.84           |
| <b>(BN)<sub>16</sub>-0F<sub>8</sub>-02</b> | <b>T<sub>d</sub></b>  | <b>0.00</b> | <b>-349.00</b> | <b>0</b>        | <b>6.37</b> | <b>-7.38</b> | <b>-1.01</b> | <b>0.00</b> | <b>0.07</b> | <b>-3.53</b> | <b>9.45</b>     | <b>22.57</b>    |
| (BN) <sub>16</sub> -0F <sub>8</sub> -01    | C <sub>1</sub>        | 17.10       | -347.93        | 0               | 6.46        | -7.34        | -0.88        | 0.00        | 0.13        | -4.30        | 9.60            | 22.86           |
| (BN) <sub>16</sub> -2F <sub>8</sub> -59    | C <sub>1</sub>        | 60.85       | -345.19        | 0               | 6.52        | -7.73        | -1.21        | 0.08        | 0.17        | -3.59        | 8.83            | 23.08           |
| (BN) <sub>16</sub> -1F <sub>8</sub> -20    | C <sub>2v</sub>       | 82.53       | -343.84        | 2               | 6.18        | -7.51        | -1.33        | 0.01        | 0.25        | -4.71        | 9.74            | 23.67           |
| (BN) <sub>16</sub> -2F <sub>8</sub> -38    | C <sub>1</sub>        | 85.40       | -343.66        | 2               | 6.12        | -7.47        | -1.34        | 0.06        | 0.23        | -4.04        | 9.54            | 23.11           |
| (BN) <sub>16</sub> -0F <sub>8</sub> -03    | C <sub>1</sub>        | 96.84       | -342.94        | 2               | 6.08        | -7.52        | -1.44        | 0.18        | 1.03        | -4.55        | 10.38           | 24.01           |
| (BN) <sub>16</sub> -1F <sub>8</sub> -05    | C <sub>1</sub>        | 100.10      | -342.74        | 2               | 5.87        | -7.46        | -1.59        | 0.24        | 1.31        | -3.98        | 9.95            | 23.78           |
| (BN) <sub>16</sub> -1F <sub>8</sub> -03    | C <sub>1</sub>        | 103.28      | -342.54        | 2               | 5.75        | -7.35        | -1.60        | 0.23        | 1.10        | -3.88        | 9.96            | 24.03           |
| (BN) <sub>16</sub> -1F <sub>8</sub> -22    | C <sub>1</sub>        | 106.41      | -342.35        | 2               | 5.79        | -7.27        | -1.48        | 0.17        | 0.82        | -3.58        | 10.15           | 23.86           |
| (BN) <sub>16</sub> -2F <sub>8</sub> -83    | C <sub>1</sub>        | 107.88      | -342.25        | 2               | 5.76        | -7.41        | -1.65        | 0.20        | 0.88        | -3.76        | 9.73            | 23.21           |
| (BN) <sub>16</sub> -1F <sub>8</sub> -04    | C <sub>1</sub>        | 109.61      | -342.15        | 2               | 6.01        | -7.52        | -1.51        | 0.13        | 0.67        | -4.35        | 9.93            | 23.59           |
| (BN) <sub>16</sub> -2F <sub>8</sub> -89    | C <sub>1</sub>        | 110.36      | -342.10        | 3               | 6.26        | -7.56        | -1.30        | 0.10        | 0.64        | -4.72        | 9.79            | 23.59           |
| (BN) <sub>16</sub> -2F <sub>8</sub> -37    | C <sub>1</sub>        | 111.20      | -342.05        | 2               | 6.03        | -7.56        | -1.53        | 0.12        | 0.52        | -3.62        | 9.62            | 23.38           |
| (BN) <sub>16</sub> -2F <sub>8</sub> -101   | C <sub>1</sub>        | 111.32      | -342.04        | 3               | 5.96        | -7.57        | -1.61        | 0.09        | 0.48        | -4.70        | 9.76            | 23.53           |
| (BN) <sub>16</sub> -1F <sub>8</sub> -21    | C <sub>2</sub>        | 111.88      | -342.00        | 2               | 5.87        | -7.39        | -1.52        | 0.14        | 0.73        | -4.29        | 10.52           | 23.42           |
| (BN) <sub>16</sub> -2F <sub>8</sub> -94    | C <sub>1</sub>        | 112.08      | -341.99        | 2               | 5.79        | -7.37        | -1.57        | 0.16        | 0.64        | -3.42        | 9.81            | 23.35           |
| (BN) <sub>16</sub> -0F <sub>8</sub> -05    | C <sub>1</sub>        | 112.83      | -341.95        | 2               | 5.48        | -7.38        | -1.90        | 0.30        | 1.60        | -4.60        | 10.51           | 24.34           |

|                                            |                      |             |                |          |             |              |              |             |             |              |             |              |
|--------------------------------------------|----------------------|-------------|----------------|----------|-------------|--------------|--------------|-------------|-------------|--------------|-------------|--------------|
| (BN) <sub>16</sub> -1F <sub>8</sub> -23    | C <sub>1</sub>       | 118.12      | -341.61        | 2        | 5.80        | -7.42        | -1.62        | 0.15        | 0.74        | -4.25        | 10.08       | 24.23        |
| (BN) <sub>16</sub> -0F <sub>8</sub> -04    | C <sub>1</sub>       | 121.65      | -341.39        | 3        | 5.95        | -7.68        | -1.73        | 0.12        | 1.05        | -5.61        | 10.83       | 24.39        |
| (BN) <sub>16</sub> -0F <sub>8</sub> -06    | C <sub>1</sub>       | 121.81      | -341.38        | 2        | 5.69        | -7.50        | -1.81        | 0.25        | 1.34        | -4.34        | 10.51       | 24.13        |
| (BN) <sub>16</sub> -2F <sub>8</sub> -36    | C <sub>1</sub>       | 126.94      | -341.06        | 2        | 5.84        | -7.46        | -1.62        | 0.06        | 1.33        | -2.89        | 9.04        | 23.41        |
| (BN) <sub>16</sub> -1F <sub>8</sub> -01    | C <sub>1</sub>       | 134.94      | -340.56        | 2        | 5.69        | -7.27        | -1.59        | 0.28        | 1.36        | -3.72        | 10.30       | 23.90        |
| (BN) <sub>16</sub> -2F <sub>8</sub> -30    | C <sub>2</sub>       | 135.25      | -340.54        | 2        | 5.95        | -7.42        | -1.47        | 0.26        | 1.18        | -3.15        | 10.07       | 23.86        |
| (BN) <sub>16</sub> -1F <sub>8</sub> -02    | C <sub>1</sub>       | 143.40      | -340.03        | 3        | 5.76        | -7.43        | -1.67        | 0.14        | 0.90        | -4.19        | 10.31       | 23.80        |
| (BN) <sub>16</sub> -2F <sub>8</sub> -111   | C <sub>1</sub>       | 281.44      | -331.41        | 2        | 4.07        | -6.79        | -2.72        | 0.19        | 0.80        | -2.41        | 10.55       | 24.16        |
| <b>(BN)<sub>17</sub>-0F<sub>8</sub>-01</b> | <b>C<sub>S</sub></b> | <b>0.00</b> | <b>-347.72</b> | <b>0</b> | <b>6.07</b> | <b>-7.30</b> | <b>-1.23</b> | <b>0.07</b> | <b>0.33</b> | <b>-4.03</b> | <b>9.35</b> | <b>22.43</b> |
| (BN) <sub>17</sub> -1F <sub>8</sub> -026   | C <sub>1</sub>       | 28.88       | -346.02        | 1        | 6.28        | -7.57        | -1.28        | 0.07        | 0.42        | -4.66        | 9.37        | 22.55        |
| (BN) <sub>17</sub> -0F <sub>8</sub> -03    | C <sub>1</sub>       | 31.38       | -345.87        | 1        | 6.01        | -7.50        | -1.48        | 0.18        | 1.05        | -4.12        | 9.73        | 23.09        |
| (BN) <sub>17</sub> -2F <sub>8</sub> -050   | C <sub>1</sub>       | 44.49       | -345.10        | 2        | 6.27        | -7.50        | -1.23        | 0.13        | 0.68        | -3.82        | 9.12        | 22.63        |
| (BN) <sub>17</sub> -2F <sub>8</sub> -148   | C <sub>1</sub>       | 45.72       | -345.03        | 1        | 5.98        | -7.35        | -1.36        | 0.15        | 0.70        | -3.35        | 9.10        | 22.66        |
| (BN) <sub>17</sub> -1F <sub>8</sub> -025   | C <sub>1</sub>       | 50.30       | -344.76        | 1        | 5.85        | -7.34        | -1.49        | 0.17        | 0.88        | -3.36        | 9.52        | 23.11        |
| (BN) <sub>17</sub> -2F <sub>8</sub> -051   | C <sub>S</sub>       | 60.44       | -344.16        | 1        | 6.20        | -7.47        | -1.27        | 0.10        | 0.51        | -3.79        | 9.02        | 22.63        |
| (BN) <sub>17</sub> -1F <sub>8</sub> -007   | C <sub>1</sub>       | 63.75       | -343.97        | 2        | 5.88        | -7.41        | -1.53        | 0.20        | 1.21        | -3.89        | 9.75        | 23.13        |
| (BN) <sub>17</sub> -2F <sub>8</sub> -052   | C <sub>1</sub>       | 64.36       | -343.93        | 2        | 5.99        | -7.40        | -1.41        | 0.07        | 0.35        | -3.92        | 9.42        | 22.66        |
| (BN) <sub>17</sub> -2F <sub>8</sub> -144   | C <sub>1</sub>       | 65.32       | -343.87        | 2        | 5.93        | -7.34        | -1.41        | 0.13        | 0.69        | -3.75        | 9.40        | 22.97        |
| (BN) <sub>17</sub> -2F <sub>8</sub> -048   | C <sub>1</sub>       | 68.60       | -343.68        | 2        | 5.85        | -7.38        | -1.54        | 0.08        | 0.44        | -3.90        | 9.75        | 22.39        |
| (BN) <sub>17</sub> -2F <sub>8</sub> -134   | C <sub>1</sub>       | 72.39       | -343.46        | 3        | 5.83        | -7.41        | -1.58        | 0.12        | 0.72        | -3.92        | 9.84        | 22.56        |
| (BN) <sub>17</sub> -2F <sub>8</sub> -123   | C <sub>1</sub>       | 73.35       | -343.40        | 2        | 6.23        | -7.46        | -1.23        | 0.07        | 0.43        | -4.28        | 9.38        | 22.93        |
| (BN) <sub>17</sub> -2F <sub>8</sub> -133   | C <sub>1</sub>       | 73.82       | -343.37        | 2        | 6.09        | -7.47        | -1.38        | 0.15        | 0.93        | -3.93        | 9.19        | 22.56        |
| (BN) <sub>17</sub> -1F <sub>8</sub> -027   | C <sub>1</sub>       | 74.95       | -343.31        | 2        | 5.92        | -7.33        | -1.41        | 0.10        | 0.72        | -4.06        | 9.90        | 23.31        |
| (BN) <sub>17</sub> -1F <sub>8</sub> -015   | C <sub>1</sub>       | 76.44       | -343.22        | 2        | 5.68        | -7.44        | -1.76        | 0.19        | 1.14        | -4.24        | 9.82        | 23.66        |
| (BN) <sub>17</sub> -1F <sub>8</sub> -003   | C <sub>1</sub>       | 81.44       | -342.93        | 2        | 5.78        | -7.32        | -1.53        | 0.20        | 1.24        | -4.39        | 10.01       | 23.29        |
| (BN) <sub>17</sub> -1F <sub>8</sub> -004   | C <sub>1</sub>       | 84.34       | -342.76        | 2        | 5.68        | -7.40        | -1.73        | 0.12        | 0.86        | -3.70        | 9.89        | 23.37        |
| (BN) <sub>17</sub> -1F <sub>8</sub> -008   | C <sub>1</sub>       | 86.78       | -342.61        | 3        | 5.80        | -7.43        | -1.63        | 0.11        | 0.97        | -4.84        | 10.20       | 23.35        |
| (BN) <sub>17</sub> -1F <sub>8</sub> -028   | C <sub>1</sub>       | 89.95       | -342.43        | 2        | 5.87        | -7.45        | -1.58        | 0.15        | 0.98        | -4.36        | 9.85        | 23.87        |
| (BN) <sub>17</sub> -0F <sub>8</sub> -02    | C <sub>1</sub>       | 90.36       | -342.40        | 2        | 5.41        | -7.33        | -1.91        | 0.30        | 2.00        | -4.23        | 10.30       | 23.90        |
| (BN) <sub>17</sub> -1F <sub>8</sub> -018   | C <sub>1</sub>       | 95.62       | -342.09        | 2        | 5.29        | -7.26        | -1.97        | 0.23        | 1.47        | -3.89        | 9.91        | 23.46        |
| <b>(BN)<sub>18</sub>-0F<sub>8</sub>-02</b> | <b>S<sub>6</sub></b> | <b>0.00</b> | <b>-349.07</b> | <b>0</b> | <b>6.55</b> | <b>-7.44</b> | <b>-0.90</b> | <b>0.09</b> | <b>0.45</b> | <b>-3.29</b> | <b>8.78</b> | <b>21.71</b> |
| (BN) <sub>18</sub> -1F <sub>8</sub> -022   | C <sub>2</sub>       | 9.01        | -348.57        | 0        | 6.36        | -7.50        | -1.14        | 0.16        | 0.98        | -3.94        | 9.16        | 22.02        |
| (BN) <sub>18</sub> -0F <sub>8</sub> -04    | C <sub>2</sub>       | 15.17       | -348.23        | 0        | 6.23        | -7.39        | -1.16        | 0.08        | 0.49        | -4.09        | 9.17        | 22.01        |
| (BN) <sub>18</sub> -0F <sub>8</sub> -05    | C <sub>S</sub>       | 24.21       | -347.73        | 0        | 5.95        | -7.40        | -1.45        | 0.09        | 0.74        | -3.87        | 9.23        | 22.27        |
| (BN) <sub>18</sub> -1F <sub>8</sub> -041   | C <sub>S</sub>       | 24.78       | -347.70        | 1        | 6.08        | -7.38        | -1.30        | 0.09        | 0.52        | -4.46        | 9.24        | 21.64        |
| (BN) <sub>18</sub> -1F <sub>8</sub> -039   | C <sub>1</sub>       | 30.81       | -347.36        | 1        | 6.19        | -7.45        | -1.26        | 0.08        | 0.48        | -4.40        | 9.13        | 21.91        |
| (BN) <sub>18</sub> -2F <sub>8</sub> -085   | C <sub>1</sub>       | 39.59       | -346.87        | 1        | 6.13        | -7.43        | -1.30        | 0.07        | 0.37        | -3.93        | 8.75        | 21.63        |
| (BN) <sub>18</sub> -1F <sub>8</sub> -042   | C <sub>S</sub>       | 42.43       | -346.71        | 1        | 6.08        | -7.37        | -1.29        | 0.09        | 0.57        | -4.46        | 9.29        | 21.73        |
| (BN) <sub>18</sub> -2F <sub>8</sub> -083   | C <sub>2</sub>       | 45.16       | -346.56        | 2        | 6.25        | -7.32        | -1.07        | 0.09        | 0.53        | -4.05        | 8.98        | 21.72        |
| (BN) <sub>18</sub> -2F <sub>8</sub> -312   | C <sub>1</sub>       | 45.63       | -346.54        | 1        | 6.16        | -7.37        | -1.21        | 0.10        | 0.45        | -3.34        | 9.01        | 21.81        |
| (BN) <sub>18</sub> -2F <sub>8</sub> -076   | C <sub>1</sub>       | 46.12       | -346.51        | 1        | 6.18        | -7.47        | -1.29        | 0.09        | 0.46        | -3.57        | 8.96        | 21.81        |
| (BN) <sub>18</sub> -2F <sub>8</sub> -140   | C <sub>1</sub>       | 57.55       | -345.87        | 1        | 6.18        | -7.54        | -1.35        | 0.09        | 0.51        | -3.49        | 8.98        | 22.21        |
| (BN) <sub>18</sub> -1F <sub>8</sub> -037   | C <sub>1</sub>       | 60.25       | -345.72        | 1        | 5.70        | -7.33        | -1.63        | 0.12        | 0.84        | -3.65        | 9.32        | 22.52        |
| (BN) <sub>18</sub> -2F <sub>8</sub> -082   | C <sub>1</sub>       | 66.92       | -345.35        | 2        | 6.20        | -7.42        | -1.22        | 0.09        | 0.66        | -4.32        | 9.15        | 21.76        |
| (BN) <sub>18</sub> -1F <sub>8</sub> -010   | C <sub>1</sub>       | 69.36       | -345.22        | 1        | 5.81        | -7.33        | -1.52        | 0.19        | 1.29        | -3.60        | 9.45        | 22.36        |

|                                             |                       |             |                |          |             |              |              |             |             |              |             |              |
|---------------------------------------------|-----------------------|-------------|----------------|----------|-------------|--------------|--------------|-------------|-------------|--------------|-------------|--------------|
| (BN) <sub>18</sub> -2F <sub>8</sub> -036    | C <sub>1</sub>        | 74.63       | -344.93        | 2        | 6.03        | -7.43        | -1.40        | 0.09        | 0.66        | -4.23        | 9.18        | 21.81        |
| (BN) <sub>18</sub> -2F <sub>8</sub> -084    | C <sub>1</sub>        | 79.17       | -344.67        | 2        | 5.99        | -7.37        | -1.38        | 0.08        | 0.49        | -3.69        | 9.39        | 21.91        |
| (BN) <sub>18</sub> -2F <sub>8</sub> -289    | C <sub>1</sub>        | 79.62       | -344.65        | 2        | 5.93        | -7.39        | -1.46        | 0.06        | 0.59        | -4.19        | 9.15        | 22.39        |
| (BN) <sub>18</sub> -1F <sub>8</sub> -012    | C <sub>1</sub>        | 80.54       | -344.60        | 2        | 5.70        | -7.28        | -1.58        | 0.20        | 1.45        | -3.86        | 9.68        | 22.62        |
| (BN) <sub>18</sub> -1F <sub>8</sub> -023    | C <sub>1</sub>        | 81.16       | -344.56        | 2        | 5.87        | -7.40        | -1.53        | 0.13        | 1.02        | -3.70        | 9.51        | 22.77        |
| (BN) <sub>18</sub> -2F <sub>8</sub> -249    | C <sub>1</sub>        | 86.08       | -344.29        | 2        | 5.78        | -7.28        | -1.50        | 0.09        | 0.61        | -3.38        | 9.41        | 22.46        |
| (BN) <sub>18</sub> -0F <sub>8</sub> -03     | C <sub>1</sub>        | 87.57       | -344.21        | 0        | 5.35        | -7.18        | -1.83        | 0.10        | 0.85        | -3.45        | 9.84        | 22.91        |
| (BN) <sub>18</sub> -1F <sub>8</sub> -03     | C <sub>1</sub>        | 93.12       | -343.90        | 1        | 5.58        | -7.25        | -1.67        | 0.19        | 1.42        | -3.93        | 9.33        | 22.88        |
| (BN) <sub>18</sub> -0F <sub>8</sub> -06     | C <sub>1</sub>        | 96.37       | -343.72        | 2        | 5.39        | -7.27        | -1.88        | 0.28        | 2.36        | -3.73        | 10.06       | 23.43        |
| (BN) <sub>18</sub> -1F <sub>8</sub> -040    | C <sub>1</sub>        | 96.55       | -343.71        | 2        | 5.53        | -7.38        | -1.85        | 0.18        | 1.44        | -3.90        | 9.55        | 23.39        |
| (BN) <sub>18</sub> -0F <sub>8</sub> -01     | C <sub>1</sub>        | 116.18      | -342.62        | 3        | 5.99        | -7.58        | -1.59        | 0.11        | 1.54        | -4.16        | 10.21       | 23.38        |
| <b>(BN)<sub>19</sub>-1F<sub>8</sub>-049</b> | <b>C<sub>1</sub></b>  | <b>0.00</b> | <b>-349.91</b> | <b>0</b> | <b>6.33</b> | <b>-7.37</b> | <b>-1.04</b> | <b>0.07</b> | <b>0.39</b> | <b>-3.81</b> | <b>8.54</b> | <b>21.19</b> |
| (BN) <sub>19</sub> -0F <sub>8</sub> -06     | C <sub>3</sub>        | 15.55       | -349.09        | 0        | 6.22        | -7.36        | -1.14        | 0.08        | 0.65        | -4.60        | 9.03        | 21.50        |
| (BN) <sub>19</sub> -0F <sub>8</sub> -04     | C <sub>S</sub>        | 22.17       | -348.74        | 1        | 5.70        | -7.36        | -1.66        | 0.11        | 0.90        | -4.45        | 9.26        | 21.76        |
| (BN) <sub>19</sub> -2F <sub>8</sub> -115    | C <sub>1</sub>        | 23.04       | -348.70        | 1        | 6.07        | -7.29        | -1.22        | 0.06        | 0.31        | -3.69        | 8.45        | 20.98        |
| (BN) <sub>19</sub> -0F <sub>8</sub> -03     | C <sub>S</sub>        | 30.21       | -348.32        | 1        | 5.61        | -7.33        | -1.72        | 0.11        | 0.92        | -4.40        | 9.25        | 21.85        |
| (BN) <sub>19</sub> -2F <sub>8</sub> -105    | C <sub>1</sub>        | 37.84       | -347.92        | 1        | 6.03        | -7.28        | -1.25        | 0.06        | 0.33        | -3.55        | 8.39        | 21.19        |
| (BN) <sub>19</sub> -1F <sub>8</sub> -050    | C <sub>1</sub>        | 38.10       | -347.90        | 1        | 6.01        | -7.28        | -1.28        | 0.06        | 0.51        | -3.65        | 8.90        | 21.50        |
| (BN) <sub>19</sub> -1F <sub>8</sub> -056    | C <sub>S</sub>        | 41.69       | -347.71        | 1        | 5.99        | -7.39        | -1.39        | 0.11        | 0.78        | -4.32        | 9.05        | 21.32        |
| (BN) <sub>19</sub> -1F <sub>8</sub> -051    | C <sub>1</sub>        | 46.94       | -347.44        | 1        | 5.94        | -7.36        | -1.42        | 0.10        | 0.80        | -4.26        | 9.12        | 21.63        |
| (BN) <sub>19</sub> -1F <sub>8</sub> -061    | C <sub>1</sub>        | 54.60       | -347.03        | 1        | 5.87        | -7.27        | -1.40        | 0.08        | 0.64        | -4.11        | 9.02        | 21.68        |
| (BN) <sub>19</sub> -2F <sub>8</sub> -317    | C <sub>1</sub>        | 58.47       | -346.83        | 2        | 6.18        | -7.50        | -1.32        | 0.06        | 0.51        | -4.05        | 9.00        | 21.34        |
| (BN) <sub>19</sub> -2F <sub>8</sub> -498    | C <sub>S</sub>        | 58.52       | -346.83        | 0        | 6.01        | -7.35        | -1.34        | 0.12        | 0.84        | -3.19        | 8.46        | 21.56        |
| (BN) <sub>19</sub> -2F <sub>8</sub> -103    | C <sub>1</sub>        | 60.06       | -346.75        | 1        | 5.92        | -7.31        | -1.39        | 0.08        | 0.60        | -3.70        | 8.67        | 21.55        |
| (BN) <sub>19</sub> -2F <sub>8</sub> -110    | C <sub>1</sub>        | 64.42       | -346.52        | 0        | 6.03        | -7.44        | -1.41        | 0.11        | 0.72        | -2.83        | 8.61        | 21.65        |
| (BN) <sub>19</sub> -2F <sub>8</sub> -477    | C <sub>1</sub>        | 68.27       | -346.31        | 2        | 6.18        | -7.32        | -1.14        | 0.07        | 0.64        | -4.02        | 8.79        | 21.67        |
| (BN) <sub>19</sub> -2F <sub>8</sub> -121    | C <sub>1</sub>        | 68.68       | -346.29        | 2        | 5.89        | -7.39        | -1.49        | 0.09        | 0.72        | -3.62        | 9.02        | 21.81        |
| (BN) <sub>19</sub> -2F <sub>8</sub> -422    | C <sub>1</sub>        | 69.19       | -346.27        | 1        | 5.99        | -7.39        | -1.40        | 0.08        | 0.60        | -3.57        | 8.82        | 21.74        |
| (BN) <sub>19</sub> -1F <sub>8</sub> -009    | C <sub>1</sub>        | 72.12       | -346.11        | 1        | 5.67        | -7.29        | -1.61        | 0.21        | 1.83        | -3.08        | 9.23        | 22.34        |
| (BN) <sub>19</sub> -1F <sub>8</sub> -014    | C <sub>1</sub>        | 74.55       | -345.98        | 1        | 5.83        | -7.32        | -1.49        | 0.17        | 1.41        | -3.72        | 9.10        | 22.06        |
| (BN) <sub>19</sub> -1F <sub>8</sub> -016    | C <sub>1</sub>        | 77.67       | -345.82        | 2        | 5.83        | -7.41        | -1.58        | 0.22        | 2.20        | -4.11        | 9.34        | 22.57        |
| (BN) <sub>19</sub> -2F <sub>8</sub> -484    | C <sub>1</sub>        | 79.02       | -345.75        | 1        | 5.89        | -7.31        | -1.42        | 0.11        | 0.80        | -3.74        | 8.71        | 21.77        |
| (BN) <sub>19</sub> -0F <sub>8</sub> -02     | C <sub>1</sub>        | 79.31       | -345.73        | 2        | 5.92        | -7.45        | -1.53        | 0.20        | 1.92        | -4.47        | 9.67        | 22.52        |
| (BN) <sub>19</sub> -1F <sub>8</sub> -057    | C <sub>1</sub>        | 81.39       | -345.62        | 1        | 5.55        | -7.10        | -1.54        | 0.10        | 0.94        | -3.45        | 8.87        | 21.89        |
| (BN) <sub>19</sub> -1F <sub>8</sub> -020    | C <sub>1</sub>        | 86.03       | -345.38        | 2        | 5.82        | -7.37        | -1.54        | 0.10        | 1.18        | -3.91        | 9.27        | 22.12        |
| (BN) <sub>19</sub> -0F <sub>8</sub> -05     | C <sub>S</sub>        | 100.19      | -344.64        | 2        | 5.88        | -7.43        | -1.56        | 0.18        | 1.94        | -3.75        | 9.73        | 22.57        |
| (BN) <sub>19</sub> -0F <sub>8</sub> -01     | C <sub>1</sub>        | 109.68      | -344.14        | 2        | 5.33        | -7.24        | -1.90        | 0.28        | 2.82        | -3.54        | 9.87        | 23.08        |
| <b>(BN)<sub>20</sub>-2F<sub>8</sub>-343</b> | <b>C<sub>4h</sub></b> | <b>0.00</b> | <b>-351.17</b> | <b>0</b> | <b>6.37</b> | <b>-7.47</b> | <b>-1.09</b> | <b>0.01</b> | <b>0.05</b> | <b>-2.81</b> | <b>8.01</b> | <b>20.27</b> |
| (BN) <sub>20</sub> -2F <sub>8</sub> -160    | C <sub>2</sub>        | 16.14       | -350.36        | 0        | 6.40        | -7.41        | -1.01        | 0.01        | 0.13        | -3.28        | 8.01        | 20.51        |
| (BN) <sub>20</sub> -0F <sub>8</sub> -06     | C <sub>2</sub>        | 18.60       | -350.24        | 0        | 6.23        | -7.44        | -1.22        | 0.08        | 0.72        | -4.33        | 8.82        | 20.98        |
| (BN) <sub>20</sub> -1F <sub>8</sub> -029    | C <sub>1</sub>        | 27.64       | -349.79        | 0        | 5.87        | -7.24        | -1.37        | 0.07        | 0.57        | -3.68        | 8.60        | 20.81        |
| (BN) <sub>20</sub> -1F <sub>8</sub> -074    | C <sub>1</sub>        | 39.35       | -349.20        | 0        | 6.04        | -7.28        | -1.24        | 0.08        | 0.64        | -3.52        | 8.54        | 20.87        |
| (BN) <sub>20</sub> -1F <sub>8</sub> -063    | C <sub>1</sub>        | 41.22       | -349.11        | 1        | 6.08        | -7.40        | -1.31        | 0.07        | 0.65        | -4.32        | 8.69        | 21.13        |
| (BN) <sub>20</sub> -2F <sub>8</sub> -851    | C <sub>1</sub>        | 47.44       | -348.80        | 1        | 6.19        | -7.31        | -1.12        | 0.02        | 0.23        | -3.45        | 8.29        | 20.70        |
| (BN) <sub>20</sub> -1F <sub>8</sub> -030    | C <sub>1</sub>        | 50.43       | -348.65        | 1        | 5.91        | -7.34        | -1.43        | 0.04        | 0.51        | -4.00        | 8.87        | 21.16        |

|                                            |                       |             |                |          |             |              |              |             |             |              |             |              |
|--------------------------------------------|-----------------------|-------------|----------------|----------|-------------|--------------|--------------|-------------|-------------|--------------|-------------|--------------|
| (BN) <sub>20</sub> -0F <sub>8</sub> -04    | C <sub>1</sub>        | 54.97       | -348.42        | 1        | 5.79        | -7.38        | -1.60        | 0.11        | 1.18        | -4.19        | 9.09        | 21.50        |
| (BN) <sub>20</sub> -1F <sub>8</sub> -036   | C <sub>1</sub>        | 55.60       | -348.39        | 1        | 6.12        | -7.43        | -1.31        | 0.10        | 0.95        | -4.11        | 8.79        | 21.57        |
| (BN) <sub>20</sub> -1F <sub>8</sub> -066   | C <sub>1</sub>        | 57.14       | -348.31        | 1        | 5.84        | -7.34        | -1.50        | 0.10        | 1.03        | -4.22        | 9.07        | 21.24        |
| (BN) <sub>20</sub> -2F <sub>8</sub> -775   | C <sub>1</sub>        | 57.66       | -348.29        | 1        | 6.07        | -7.43        | -1.36        | 0.09        | 0.75        | -3.83        | 8.64        | 20.77        |
| (BN) <sub>20</sub> -1F <sub>8</sub> -067   | C <sub>1</sub>        | 58.06       | -348.27        | 1        | 5.84        | -7.34        | -1.50        | 0.10        | 0.95        | -4.09        | 8.93        | 21.22        |
| (BN) <sub>20</sub> -0F <sub>8</sub> -02    | C <sub>1</sub>        | 58.25       | -348.26        | 1        | 5.98        | -7.40        | -1.42        | 0.18        | 1.97        | -3.95        | 9.11        | 21.59        |
| (BN) <sub>20</sub> -1F <sub>8</sub> -037   | C <sub>1</sub>        | 60.00       | -348.17        | 1        | 6.10        | -7.38        | -1.27        | 0.06        | 0.58        | -3.84        | 8.71        | 21.36        |
| (BN) <sub>20</sub> -2F <sub>8</sub> -153   | C <sub>1</sub>        | 61.02       | -348.12        | 0        | 6.02        | -7.34        | -1.32        | 0.14        | 1.23        | -2.84        | 8.49        | 21.46        |
| (BN) <sub>20</sub> -2F <sub>8</sub> -052   | C <sub>1</sub>        | 62.30       | -348.05        | 1        | 6.12        | -7.34        | -1.22        | 0.08        | 0.74        | -3.84        | 8.37        | 21.03        |
| (BN) <sub>20</sub> -2F <sub>8</sub> -813   | C <sub>1</sub>        | 68.34       | -347.75        | 1        | 6.13        | -7.43        | -1.29        | 0.08        | 0.84        | -3.92        | 8.42        | 21.02        |
| (BN) <sub>20</sub> -1F <sub>8</sub> -007   | C <sub>1</sub>        | 69.59       | -347.69        | 1        | 5.92        | -7.37        | -1.45        | 0.13        | 1.21        | -3.59        | 8.83        | 21.42        |
| (BN) <sub>20</sub> -1F <sub>8</sub> -065   | C <sub>1</sub>        | 74.39       | -347.45        | 1        | 5.93        | -7.35        | -1.42        | 0.08        | 0.81        | -4.14        | 8.85        | 21.40        |
| (BN) <sub>20</sub> -2F <sub>8</sub> -195   | C <sub>1</sub>        | 79.27       | -347.21        | 1        | 5.88        | -7.23        | -1.35        | 0.09        | 0.73        | -3.74        | 8.35        | 20.96        |
| (BN) <sub>20</sub> -0F <sub>8</sub> -03    | C <sub>s</sub>        | 79.96       | -347.17        | 2        | 5.93        | -7.38        | -1.45        | 0.11        | 1.54        | -4.22        | 9.33        | 21.91        |
| (BN) <sub>20</sub> -2F <sub>8</sub> -171   | C <sub>1</sub>        | 80.01       | -347.17        | 2        | 6.29        | -7.43        | -1.14        | 0.14        | 1.51        | -3.94        | 8.71        | 21.41        |
| (BN) <sub>20</sub> -2F <sub>8</sub> -485   | C <sub>1</sub>        | 80.44       | -347.15        | 1        | 6.16        | -7.46        | -1.30        | 0.09        | 0.81        | -4.15        | 8.65        | 20.85        |
| (BN) <sub>20</sub> -0F <sub>8</sub> -05    | C <sub>1</sub>        | 93.55       | -346.49        | 1        | 5.36        | -7.27        | -1.91        | 0.12        | 1.43        | -4.10        | 9.18        | 21.75        |
| <b>(BN)<sub>21</sub>-0F<sub>8</sub>-01</b> | <b>C<sub>3h</sub></b> | <b>0.00</b> | <b>-350.91</b> | <b>0</b> | <b>6.58</b> | <b>-7.35</b> | <b>-0.76</b> | <b>0.18</b> | <b>0.06</b> | <b>-3.68</b> | <b>8.56</b> | <b>21.16</b> |
| (BN) <sub>21</sub> -1F <sub>8</sub> -046   | C <sub>1</sub>        | 7.26        | -350.57        | 0        | 5.83        | -7.23        | -1.40        | 0.06        | 0.51        | -3.57        | 8.42        | 20.36        |
| (BN) <sub>21</sub> -1F <sub>8</sub> -079   | C <sub>1</sub>        | 8.31        | -350.52        | 0        | 6.31        | -7.39        | -1.08        | 0.12        | 1.19        | -3.67        | 8.43        | 20.74        |
| (BN) <sub>21</sub> -2F <sub>8</sub> -1235  | C <sub>1</sub>        | 13.45       | -350.27        | 0        | 5.71        | -7.09        | -1.38        | 0.05        | 0.26        | -2.52        | 8.18        | 20.01        |
| (BN) <sub>21</sub> -1F <sub>8</sub> -083   | C <sub>1</sub>        | 13.54       | -350.27        | 0        | 6.07        | -7.36        | -1.29        | 0.08        | 0.70        | -3.51        | 8.37        | 20.58        |
| (BN) <sub>21</sub> -2F <sub>8</sub> -333   | C <sub>1</sub>        | 23.33       | -349.80        | 0        | 6.10        | -7.29        | -1.18        | 0.08        | 0.34        | -3.21        | 8.04        | 20.27        |
| (BN) <sub>21</sub> -1F <sub>8</sub> -087   | C <sub>1</sub>        | 24.74       | -349.73        | 1        | 6.15        | -7.41        | -1.25        | 0.08        | 0.90        | -4.48        | 8.53        | 20.77        |
| (BN) <sub>21</sub> -2F <sub>8</sub> -1005  | C <sub>1</sub>        | 25.15       | -349.71        | 1        | 6.17        | -7.39        | -1.22        | 0.05        | 0.50        | -3.57        | 8.24        | 20.54        |
| (BN) <sub>21</sub> -1F <sub>8</sub> -081   | C <sub>1</sub>        | 28.75       | -349.54        | 1        | 6.18        | -7.47        | -1.29        | 0.06        | 0.87        | -3.91        | 8.67        | 20.89        |
| (BN) <sub>21</sub> -1F <sub>8</sub> -080   | C <sub>1</sub>        | 28.84       | -349.54        | 1        | 5.82        | -7.34        | -1.51        | 0.05        | 0.65        | -3.90        | 8.69        | 20.77        |
| (BN) <sub>21</sub> -2F <sub>8</sub> -1024  | C <sub>1</sub>        | 30.81       | -349.44        | 1        | 6.00        | -7.32        | -1.31        | 0.06        | 0.54        | -3.64        | 8.40        | 20.35        |
| (BN) <sub>21</sub> -1F <sub>8</sub> -026   | C <sub>1</sub>        | 30.87       | -349.44        | 1        | 5.91        | -7.39        | -1.48        | 0.11        | 1.28        | -3.94        | 8.53        | 20.83        |
| (BN) <sub>21</sub> -2F <sub>8</sub> -1208  | C <sub>1</sub>        | 31.64       | -349.40        | 0        | 6.07        | -7.32        | -1.25        | 0.05        | 0.39        | -3.06        | 8.22        | 20.31        |
| (BN) <sub>21</sub> -1F <sub>8</sub> -082   | C <sub>1</sub>        | 32.30       | -349.37        | 1        | 6.06        | -7.40        | -1.34        | 0.10        | 1.11        | -3.80        | 8.75        | 20.86        |
| (BN) <sub>21</sub> -2F <sub>8</sub> -548   | C <sub>1</sub>        | 34.58       | -349.26        | 1        | 5.87        | -7.28        | -1.41        | 0.06        | 0.64        | -3.50        | 8.29        | 20.57        |
| (BN) <sub>21</sub> -2F <sub>8</sub> -1218  | C <sub>1</sub>        | 37.03       | -349.15        | 0        | 6.11        | -7.33        | -1.22        | 0.10        | 0.84        | -3.22        | 8.16        | 20.26        |
| (BN) <sub>21</sub> -2F <sub>8</sub> -1179  | C <sub>1</sub>        | 40.00       | -349.01        | 1        | 5.91        | -7.27        | -1.36        | 0.08        | 0.83        | -3.54        | 8.32        | 20.43        |
| (BN) <sub>21</sub> -2F <sub>8</sub> -746   | C <sub>1</sub>        | 41.45       | -348.94        | 1        | 6.04        | -7.35        | -1.30        | 0.05        | 0.55        | -3.53        | 8.41        | 20.49        |
| (BN) <sub>21</sub> -0F <sub>8</sub> -03    | C <sub>1</sub>        | 45.21       | -348.76        | 1        | 5.79        | -7.38        | -1.59        | 0.10        | 1.42        | -4.44        | 8.96        | 21.12        |
| (BN) <sub>21</sub> -0F <sub>8</sub> -05    | C <sub>1</sub>        | 45.21       | -348.76        | 1        | 5.79        | -7.38        | -1.59        | 0.10        | 1.42        | -4.44        | 8.96        | 21.12        |
| (BN) <sub>21</sub> -0F <sub>8</sub> -02    | C <sub>1</sub>        | 49.60       | -348.55        | 2        | 5.69        | -7.42        | -1.73        | 0.11        | 1.55        | -4.60        | 9.18        | 21.37        |
| (BN) <sub>21</sub> -1F <sub>8</sub> -091   | C <sub>1</sub>        | 49.66       | -348.55        | 0        | 5.91        | -7.26        | -1.35        | 0.09        | 0.98        | -3.88        | 8.44        | 20.77        |
| (BN) <sub>21</sub> -2F <sub>8</sub> -706   | C <sub>1</sub>        | 50.50       | -348.51        | 1        | 6.10        | -7.44        | -1.34        | 0.10        | 1.08        | -4.00        | 8.43        | 20.50        |
| (BN) <sub>21</sub> -0F <sub>8</sub> -04    | C <sub>1</sub>        | 111.76      | -345.59        | 2        | 5.18        | -7.19        | -2.01        | 0.28        | 3.86        | -3.18        | 9.54        | 22.40        |
| <b>(BN)<sub>22</sub>-0F<sub>8</sub>-09</b> | <b>C<sub>3</sub></b>  | <b>0.00</b> | <b>-352.87</b> | <b>0</b> | <b>5.83</b> | <b>-7.30</b> | <b>-1.47</b> | <b>0.04</b> | <b>0.63</b> | <b>-3.88</b> | <b>8.33</b> | <b>19.96</b> |
| (BN) <sub>22</sub> -0F <sub>8</sub> -06    | C <sub>1</sub>        | 3.62        | -352.71        | 0        | 6.63        | -7.46        | -0.84        | 0.08        | 0.77        | -4.22        | 8.38        | 20.06        |
| (BN) <sub>22</sub> -0F <sub>8</sub> -07    | C <sub>1</sub>        | 10.51       | -352.39        | 0        | 6.29        | -7.41        | -1.12        | 0.07        | 0.79        | -4.06        | 8.38        | 20.08        |
| (BN) <sub>22</sub> -1F <sub>8</sub> -056   | C <sub>2</sub>        | 15.76       | -352.16        | 0        | 6.46        | -7.43        | -0.97        | 0.04        | 0.48        | -3.63        | 8.10        | 19.73        |

|                                             |                      |             |                |          |             |              |              |             |             |              |             |              |
|---------------------------------------------|----------------------|-------------|----------------|----------|-------------|--------------|--------------|-------------|-------------|--------------|-------------|--------------|
| (BN) <sub>22</sub> -1F <sub>8</sub> -058    | C <sub>1</sub>       | 26.48       | -351.67        | 0        | 6.00        | -7.21        | -1.21        | 0.07        | 0.63        | -3.59        | 8.19        | 19.81        |
| (BN) <sub>22</sub> -1F <sub>8</sub> -068    | C <sub>1</sub>       | 32.03       | -351.42        | 0        | 6.31        | -7.32        | -1.01        | 0.11        | 1.24        | -3.53        | 8.24        | 20.28        |
| (BN) <sub>22</sub> -2F <sub>8</sub> -355    | C <sub>1</sub>       | 35.59       | -351.25        | 0        | 6.31        | -7.37        | -1.06        | 0.06        | 0.68        | -3.53        | 7.92        | 19.94        |
| (BN) <sub>22</sub> -2F <sub>8</sub> -346    | C <sub>S</sub>       | 45.58       | -350.80        | 0        | 6.30        | -7.36        | -1.06        | 0.10        | 1.16        | -3.76        | 7.88        | 19.92        |
| (BN) <sub>22</sub> -2F <sub>8</sub> -1907   | C <sub>1</sub>       | 54.72       | -350.38        | 0        | 6.10        | -7.25        | -1.16        | 0.06        | 0.43        | -3.16        | 8.04        | 19.78        |
| (BN) <sub>22</sub> -1F <sub>8</sub> -061    | C <sub>1</sub>       | 56.56       | -350.30        | 0        | 6.24        | -7.31        | -1.07        | 0.05        | 0.56        | -3.61        | 8.24        | 20.07        |
| (BN) <sub>22</sub> -1F <sub>8</sub> -126    | C <sub>1</sub>       | 57.82       | -350.24        | 1        | 6.11        | -7.41        | -1.30        | 0.08        | 0.94        | -3.86        | 8.48        | 20.14        |
| (BN) <sub>22</sub> -1F <sub>8</sub> -123    | C <sub>1</sub>       | 58.07       | -350.23        | 1        | 6.20        | -7.41        | -1.22        | 0.07        | 1.04        | -4.27        | 8.37        | 20.39        |
| (BN) <sub>22</sub> -1F <sub>8</sub> -059    | C <sub>1</sub>       | 58.19       | -350.23        | 0        | 5.76        | -7.19        | -1.43        | 0.07        | 0.81        | -3.56        | 8.24        | 20.20        |
| (BN) <sub>22</sub> -1F <sub>8</sub> -054    | C <sub>1</sub>       | 62.09       | -350.05        | 1        | 6.02        | -7.27        | -1.25        | 0.09        | 1.10        | -3.44        | 8.65        | 20.53        |
| (BN) <sub>22</sub> -1F <sub>8</sub> -010    | C <sub>1</sub>       | 72.88       | -349.56        | 1        | 5.66        | -7.32        | -1.66        | 0.10        | 1.35        | -3.88        | 8.51        | 20.51        |
| (BN) <sub>22</sub> -0F <sub>8</sub> -08     | C <sub>1</sub>       | 73.56       | -349.53        | 1        | 5.81        | -7.41        | -1.60        | 0.11        | 1.69        | -4.19        | 8.77        | 20.72        |
| (BN) <sub>22</sub> -1F <sub>8</sub> -119    | C <sub>1</sub>       | 74.04       | -349.51        | 0        | 5.99        | -7.30        | -1.31        | 0.08        | 1.15        | -3.77        | 8.33        | 20.22        |
| (BN) <sub>22</sub> -0F <sub>8</sub> -04     | C <sub>1</sub>       | 85.09       | -349.00        | 2        | 5.75        | -7.44        | -1.69        | 0.11        | 1.83        | -4.25        | 9.00        | 21.04        |
| (BN) <sub>22</sub> -0F <sub>8</sub> -02     | C <sub>1</sub>       | 88.02       | -348.87        | 2        | 5.77        | -7.43        | -1.66        | 0.14        | 2.02        | -4.36        | 9.02        | 21.06        |
| (BN) <sub>22</sub> -0F <sub>8</sub> -05     | C <sub>1</sub>       | 105.49      | -348.08        | 2        | 5.44        | -7.39        | -1.95        | 0.16        | 2.28        | -4.42        | 9.10        | 21.19        |
| (BN) <sub>22</sub> -0F <sub>8</sub> -03     | C <sub>S</sub>       | 107.47      | -347.99        | 2        | 5.48        | -7.33        | -1.85        | 0.10        | 1.94        | -4.25        | 9.09        | 21.17        |
| (BN) <sub>22</sub> -0F <sub>8</sub> -11     | C <sub>1</sub>       | 109.93      | -347.88        | 2        | 5.94        | -7.36        | -1.41        | 0.19        | 2.99        | -3.93        | 9.12        | 21.42        |
| (BN) <sub>22</sub> -2F <sub>8</sub> -385    | C <sub>1</sub>       | 125.16      | -347.18        | 1        | 5.76        | -7.28        | -1.52        | 0.13        | 1.94        | -2.76        | 8.56        | 21.24        |
| (BN) <sub>22</sub> -0F <sub>8</sub> -12     | C <sub>1</sub>       | 126.30      | -347.13        | 2        | 5.81        | -7.36        | -1.55        | 0.20        | 3.14        | -3.72        | 9.15        | 21.45        |
| (BN) <sub>22</sub> -2F <sub>8</sub> -1047   | C <sub>S</sub>       | 145.17      | -346.27        | 3        | 6.00        | -7.55        | -1.55        | 0.06        | 1.13        | -4.35        | 8.85        | 21.13        |
| (BN) <sub>22</sub> -0F <sub>8</sub> -01     | C <sub>1</sub>       | 147.89      | -346.15        | 3        | 5.77        | -7.32        | -1.55        | 0.08        | 2.35        | -4.28        | 9.25        | 21.27        |
| (BN) <sub>22</sub> -0F <sub>8</sub> -10     | C <sub>1</sub>       | 149.94      | -346.06        | 2        | 5.14        | -7.16        | -2.02        | 0.27        | 4.38        | -3.12        | 9.38        | 22.13        |
| (BN) <sub>22</sub> -2F <sub>8</sub> -522    | C <sub>1</sub>       | 185.03      | -344.46        | 3        | 5.70        | -7.36        | -1.66        | 0.11        | 2.14        | -3.63        | 9.08        | 21.74        |
| (BN) <sub>22</sub> -2F <sub>8</sub> -1246   | C <sub>1</sub>       | 196.18      | -343.95        | 3        | 5.34        | -7.35        | -2.00        | 0.14        | 2.55        | -2.81        | 9.48        | 21.54        |
| (BN) <sub>22</sub> -2F <sub>8</sub> -1862   | C <sub>1</sub>       | 222.14      | -342.77        | 3        | 5.49        | -7.24        | -1.75        | 0.10        | 2.04        | -3.43        | 9.15        | 21.92        |
| (BN) <sub>22</sub> -2F <sub>8</sub> -1943   | C <sub>1</sub>       | 271.29      | -340.54        | 2        | 5.04        | -7.27        | -2.23        | 0.23        | 3.49        | -3.75        | 9.17        | 22.04        |
| (BN) <sub>22</sub> -2F <sub>8</sub> -1807   | C <sub>1</sub>       | 314.66      | -338.57        | 4        | 5.60        | -7.44        | -1.85        | 0.07        | 1.71        | -2.93        | 9.86        | 22.21        |
| <b>(BN)<sub>23</sub>-1F<sub>8</sub>-126</b> | <b>C<sub>1</sub></b> | <b>0.00</b> | <b>-353.37</b> | <b>0</b> | <b>6.47</b> | <b>-7.42</b> | <b>-0.95</b> | <b>0.04</b> | <b>0.48</b> | <b>-3.76</b> | <b>7.87</b> | <b>19.37</b> |
| (BN) <sub>23</sub> -0F <sub>8</sub> -03     | C <sub>1</sub>       | 11.43       | -352.87        | 0        | 6.28        | -7.38        | -1.09        | 0.07        | 0.95        | -4.02        | 8.22        | 19.74        |
| (BN) <sub>23</sub> -1F <sub>8</sub> -067    | C <sub>1</sub>       | 21.78       | -352.42        | 0        | 6.13        | -7.22        | -1.09        | 0.06        | 0.65        | -3.44        | 8.02        | 19.53        |
| (BN) <sub>23</sub> -1F <sub>8</sub> -070    | C <sub>1</sub>       | 29.29       | -352.09        | 0        | 6.11        | -7.30        | -1.18        | 0.06        | 0.65        | -3.80        | 8.05        | 19.59        |
| (BN) <sub>23</sub> -1F <sub>8</sub> -169    | C <sub>1</sub>       | 32.24       | -351.97        | 0        | 6.33        | -7.29        | -0.96        | 0.05        | 0.56        | -3.50        | 8.01        | 19.45        |
| (BN) <sub>23</sub> -2F <sub>8</sub> -2469   | C <sub>1</sub>       | 32.52       | -351.95        | 0        | 6.05        | -7.13        | -1.08        | 0.05        | 0.45        | -3.06        | 7.88        | 19.17        |
| (BN) <sub>23</sub> -1F <sub>8</sub> -148    | C <sub>1</sub>       | 32.57       | -351.95        | 0        | 6.25        | -7.29        | -1.04        | 0.05        | 0.59        | -3.76        | 8.04        | 19.58        |
| (BN) <sub>23</sub> -0F <sub>8</sub> -05     | C <sub>S</sub>       | 33.30       | -351.92        | 0        | 5.73        | -7.29        | -1.55        | 0.09        | 1.30        | -3.57        | 8.25        | 19.90        |
| (BN) <sub>23</sub> -2F <sub>8</sub> -292    | C <sub>1</sub>       | 34.57       | -351.86        | 0        | 6.21        | -7.29        | -1.08        | 0.06        | 0.59        | -3.26        | 7.91        | 19.45        |
| (BN) <sub>23</sub> -2F <sub>8</sub> -293    | C <sub>1</sub>       | 43.10       | -351.49        | 0        | 6.36        | -7.33        | -0.97        | 0.05        | 0.62        | -3.11        | 7.93        | 19.71        |
| (BN) <sub>23</sub> -2F <sub>8</sub> -2696   | C <sub>1</sub>       | 43.21       | -351.49        | 0        | 6.01        | -7.11        | -1.10        | 0.05        | 0.47        | -3.11        | 7.84        | 19.26        |
| (BN) <sub>23</sub> -2F <sub>8</sub> -2389   | C <sub>1</sub>       | 49.42       | -351.22        | 0        | 6.29        | -7.31        | -1.02        | 0.05        | 0.60        | -3.41        | 7.88        | 19.30        |
| (BN) <sub>23</sub> -2F <sub>8</sub> -2677   | C <sub>1</sub>       | 51.56       | -351.13        | 1        | 6.27        | -7.35        | -1.08        | 0.04        | 0.56        | -3.83        | 8.05        | 19.37        |
| (BN) <sub>23</sub> -1F <sub>8</sub> -071    | C <sub>1</sub>       | 54.80       | -350.98        | 0        | 5.99        | -7.24        | -1.25        | 0.10        | 1.43        | -3.24        | 8.22        | 20.11        |
| (BN) <sub>23</sub> -1F <sub>8</sub> -147    | C <sub>1</sub>       | 55.08       | -350.97        | 0        | 5.78        | -7.15        | -1.36        | 0.08        | 1.10        | -3.57        | 8.11        | 19.68        |
| (BN) <sub>23</sub> -1F <sub>8</sub> -133    | C <sub>1</sub>       | 56.11       | -350.93        | 1        | 6.04        | -7.34        | -1.30        | 0.07        | 1.05        | -3.95        | 8.37        | 19.77        |
| (BN) <sub>23</sub> -1F <sub>8</sub> -138    | C <sub>1</sub>       | 57.39       | -350.87        | 0        | 5.97        | -7.31        | -1.34        | 0.09        | 1.37        | -3.97        | 8.16        | 19.80        |

|                                              |                      |             |                |          |             |              |              |             |             |              |             |              |
|----------------------------------------------|----------------------|-------------|----------------|----------|-------------|--------------|--------------|-------------|-------------|--------------|-------------|--------------|
| (BN) <sub>23</sub> -1F <sub>8</sub> -136     | C <sub>1</sub>       | 57.79       | -350.85        | 1        | 5.89        | -7.26        | -1.37        | 0.09        | 1.32        | -3.79        | 8.27        | 19.87        |
| (BN) <sub>23</sub> -2F <sub>8</sub> -2702    | C <sub>1</sub>       | 58.14       | -350.84        | 0        | 5.94        | -7.20        | -1.26        | 0.06        | 0.78        | -3.17        | 7.83        | 19.47        |
| (BN) <sub>23</sub> -0F <sub>8</sub> -04      | C <sub>1</sub>       | 60.83       | -350.72        | 1        | 5.88        | -7.39        | -1.50        | 0.09        | 1.67        | -4.05        | 8.57        | 20.26        |
| (BN) <sub>23</sub> -2F <sub>8</sub> -2758    | C <sub>1</sub>       | 61.25       | -350.70        | 0        | 6.21        | -7.27        | -1.06        | 0.05        | 0.49        | -3.33        | 7.88        | 19.45        |
| (BN) <sub>23</sub> -2F <sub>8</sub> -2468    | C <sub>1</sub>       | 66.96       | -350.46        | 0        | 5.94        | -7.18        | -1.24        | 0.05        | 0.61        | -3.12        | 7.90        | 19.70        |
| (BN) <sub>23</sub> -0F <sub>8</sub> -01      | C <sub>1</sub>       | 75.21       | -350.10        | 1        | 5.93        | -7.33        | -1.40        | 0.18        | 3.20        | -3.65        | 8.63        | 20.84        |
| (BN) <sub>23</sub> -2F <sub>8</sub> -1822    | C <sub>1</sub>       | 76.17       | -350.06        | 1        | 5.72        | -7.34        | -1.62        | 0.07        | 1.12        | -3.31        | 8.03        | 19.99        |
| (BN) <sub>23</sub> -0F <sub>8</sub> -02      | C <sub>1</sub>       | 103.09      | -348.88        | 2        | 5.78        | -7.41        | -1.63        | 0.09        | 2.10        | -4.50        | 8.88        | 20.76        |
| (BN) <sub>23</sub> -0F <sub>8</sub> -06      | C <sub>1</sub>       | 153.56      | -346.69        | 2        | 5.14        | -7.14        | -2.00        | 0.26        | 4.91        | -3.13        | 9.26        | 21.86        |
| <b>(BN)<sub>24</sub>-2F<sub>8</sub>-1581</b> | <b>S<sub>8</sub></b> | <b>0.00</b> | <b>-354.15</b> | <b>0</b> | <b>6.45</b> | <b>-7.32</b> | <b>-0.86</b> | <b>0.02</b> | <b>0.27</b> | <b>-4.08</b> | <b>7.39</b> | <b>18.72</b> |
| (BN) <sub>24</sub> -0F <sub>8</sub> -01      | S <sub>4</sub>       | 2.08        | -354.07        | 0        | 6.61        | -7.44        | -0.83        | 0.04        | 0.56        | -3.71        | 8.04        | 19.16        |
| (BN) <sub>24</sub> -2F <sub>8</sub> -3789    | C <sub>1</sub>       | 18.69       | -353.38        | 0        | 6.39        | -7.34        | -0.94        | 0.04        | 0.38        | -3.49        | 7.54        | 18.83        |
| (BN) <sub>24</sub> -1F <sub>8</sub> -096     | C <sub>1</sub>       | 24.04       | -353.15        | 0        | 6.36        | -7.24        | -0.89        | 0.03        | 0.49        | -3.67        | 7.92        | 19.10        |
| (BN) <sub>24</sub> -1F <sub>8</sub> -097     | C <sub>1</sub>       | 25.13       | -353.11        | 0        | 6.19        | -7.25        | -1.06        | 0.04        | 0.57        | -3.59        | 7.87        | 19.24        |
| (BN) <sub>24</sub> -0F <sub>8</sub> -09      | C <sub>1</sub>       | 30.26       | -352.89        | 0        | 6.06        | -7.34        | -1.28        | 0.08        | 1.30        | -4.00        | 8.10        | 19.49        |
| (BN) <sub>24</sub> -2F <sub>8</sub> -3537    | C <sub>1</sub>       | 35.77       | -352.66        | 0        | 6.13        | -7.22        | -1.08        | 0.04        | 0.43        | -3.35        | 7.74        | 18.87        |
| (BN) <sub>24</sub> -1F <sub>8</sub> -115     | C <sub>1</sub>       | 37.34       | -352.60        | 0        | 6.24        | -7.24        | -1.00        | 0.04        | 0.63        | -3.76        | 7.83        | 19.17        |
| (BN) <sub>24</sub> -0F <sub>8</sub> -05      | S <sub>6</sub>       | 42.38       | -352.39        | 0        | 6.43        | -7.27        | -0.85        | 0.18        | 3.40        | -3.38        | 8.17        | 20.30        |
| (BN) <sub>24</sub> -1F <sub>8</sub> -106     | C <sub>1</sub>       | 43.66       | -352.34        | 1        | 6.02        | -7.31        | -1.28        | 0.04        | 0.78        | -3.81        | 8.29        | 19.27        |
| (BN) <sub>24</sub> -2F <sub>8</sub> -3543    | C <sub>1</sub>       | 44.82       | -352.29        | 0        | 6.30        | -7.24        | -0.94        | 0.03        | 0.33        | -3.40        | 7.73        | 19.05        |
| (BN) <sub>24</sub> -1F <sub>8</sub> -193     | C <sub>1</sub>       | 47.74       | -352.17        | 0        | 5.95        | -7.17        | -1.21        | 0.07        | 1.03        | -3.39        | 7.90        | 19.45        |
| (BN) <sub>24</sub> -2F <sub>8</sub> -3134    | C <sub>1</sub>       | 48.35       | -352.14        | 1        | 6.19        | -7.33        | -1.14        | 0.05        | 0.79        | -3.81        | 7.73        | 19.17        |
| (BN) <sub>24</sub> -1F <sub>8</sub> -178     | C <sub>1</sub>       | 50.46       | -352.05        | 0        | 6.22        | -7.34        | -1.12        | 0.08        | 1.43        | -3.90        | 7.97        | 19.39        |
| (BN) <sub>24</sub> -1F <sub>8</sub> -101     | C <sub>1</sub>       | 51.02       | -352.03        | 0        | 5.94        | -7.26        | -1.31        | 0.07        | 1.09        | -3.58        | 7.98        | 19.33        |
| (BN) <sub>24</sub> -2F <sub>8</sub> -3505    | C <sub>1</sub>       | 54.37       | -351.89        | 0        | 5.95        | -7.30        | -1.35        | 0.07        | 1.06        | -3.22        | 7.82        | 19.19        |
| (BN) <sub>24</sub> -0F <sub>8</sub> -08      | C <sub>1</sub>       | 55.26       | -351.85        | 1        | 5.94        | -7.39        | -1.45        | 0.07        | 1.60        | -4.01        | 8.33        | 19.87        |
| (BN) <sub>24</sub> -1F <sub>8</sub> -182     | C <sub>1</sub>       | 55.55       | -351.84        | 1        | 6.16        | -7.38        | -1.22        | 0.08        | 1.38        | -4.12        | 8.06        | 19.58        |
| (BN) <sub>24</sub> -2F <sub>8</sub> -3242    | C <sub>1</sub>       | 56.88       | -351.78        | 0        | 6.04        | -7.09        | -1.05        | 0.03        | 0.39        | -3.20        | 7.65        | 19.07        |
| (BN) <sub>24</sub> -0F <sub>8</sub> -07      | C <sub>1</sub>       | 57.51       | -351.76        | 1        | 5.83        | -7.41        | -1.58        | 0.09        | 1.85        | -3.88        | 8.36        | 19.88        |
| (BN) <sub>24</sub> -2F <sub>8</sub> -3690    | C <sub>1</sub>       | 58.49       | -351.72        | 0        | 6.09        | -7.23        | -1.14        | 0.06        | 0.88        | -3.38        | 7.61        | 19.16        |
| (BN) <sub>24</sub> -1F <sub>8</sub> -029     | C <sub>1</sub>       | 58.78       | -351.71        | 0        | 6.27        | -7.35        | -1.08        | 0.13        | 2.44        | -3.55        | 8.12        | 19.92        |
| (BN) <sub>24</sub> -2F <sub>8</sub> -2011    | C <sub>1</sub>       | 59.36       | -351.68        | 0        | 6.22        | -7.26        | -1.05        | 0.03        | 0.44        | -3.46        | 7.70        | 19.13        |
| (BN) <sub>24</sub> -2F <sub>8</sub> -3495    | C <sub>1</sub>       | 60.30       | -351.64        | 0        | 5.98        | -7.19        | -1.21        | 0.07        | 0.96        | -3.11        | 7.75        | 19.28        |
| (BN) <sub>24</sub> -1F <sub>8</sub> -195     | C <sub>1</sub>       | 63.93       | -351.49        | 0        | 6.06        | -7.23        | -1.17        | 0.09        | 1.61        | -3.26        | 8.09        | 19.92        |
| (BN) <sub>24</sub> -0F <sub>8</sub> -02      | D <sub>3d</sub>      | 72.59       | -351.13        | 0        | 6.50        | -7.40        | -0.90        | 0.06        | 1.41        | -3.54        | 8.30        | 19.58        |
| (BN) <sub>24</sub> -0F <sub>8</sub> -10      | C <sub>2</sub>       | 85.85       | -350.58        | 0        | 5.57        | -7.27        | -1.69        | 0.10        | 1.87        | -3.77        | 8.21        | 19.86        |
| (BN) <sub>24</sub> -0F <sub>8</sub> -11      | C <sub>2</sub>       | 85.85       | -350.58        | 0        | 5.57        | -7.27        | -1.69        | 0.10        | 1.87        | -3.77        | 8.21        | 19.87        |
| (BN) <sub>24</sub> -0F <sub>8</sub> -03      | C <sub>2</sub>       | 121.78      | -349.08        | 2        | 5.69        | -7.40        | -1.71        | 0.14        | 2.79        | -4.34        | 8.74        | 20.48        |
| (BN) <sub>24</sub> -0F <sub>8</sub> -06      | C <sub>3h</sub>      | 126.90      | -348.87        | 3        | 5.68        | -7.46        | -1.78        | 0.06        | 2.40        | -4.35        | 8.99        | 20.73        |
| (BN) <sub>24</sub> -0F <sub>8</sub> -04      | C <sub>1</sub>       | 170.20      | -347.06        | 2        | 5.05        | -7.10        | -2.05        | 0.26        | 5.50        | -3.02        | 9.13        | 21.63        |

**S4.** The calculated relative energies (RE) and the average pyramidization angles (PA) of B ( $PA_B$ ) and N ( $PA_N$ ) atom of  $(BN)_{15}$  (a),  $(BN)_{16}$  (b),  $(BN)_{17}$  (c),  $(BN)_{18}$  (d),  $(BN)_{19}$  (e),  $(BN)_{20}$  (f),  $(BN)_{21}$  (g),  $(BN)_{22}$  (h),  $(BN)_{23}$  (i), and  $(BN)_{24}$  (j) (“■”, “◆”, “▲” denote the  $PA_B$  of isomers containing none, one and two octagons, respectively; “●”, “▼”, “◀” denote the  $PA_N$  of isomers containing none, one and two octagons, respectively).

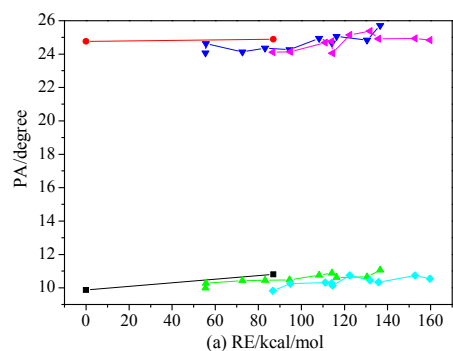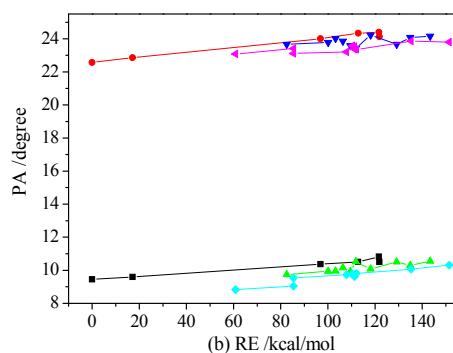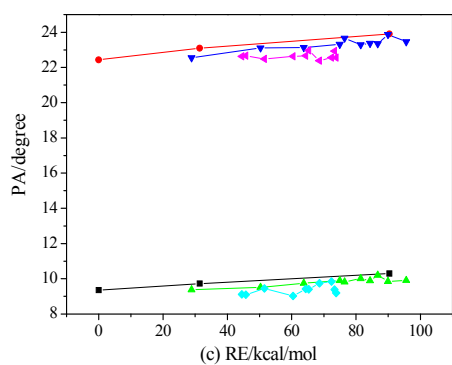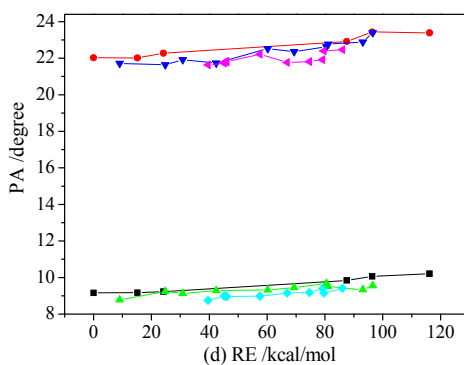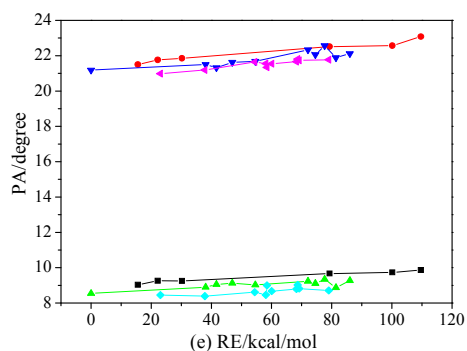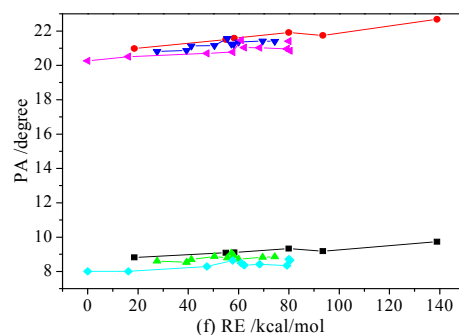



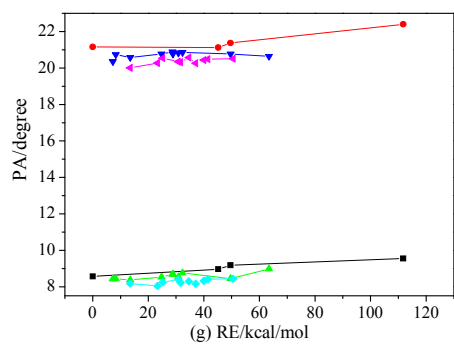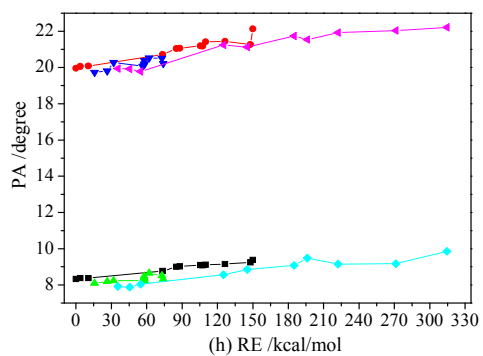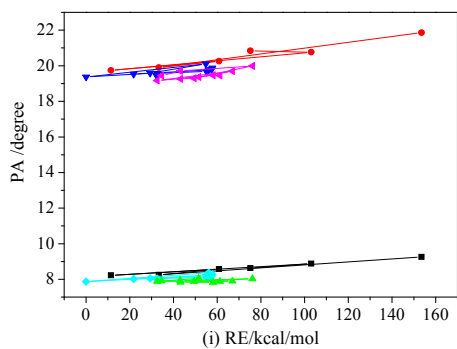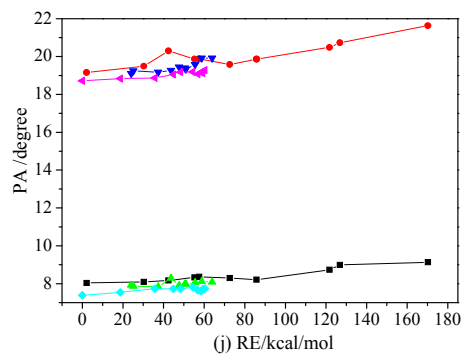

Supplement: c2ra21720a.pdf [file c2ra21720a.pdf]
